# Supplementary material for: Luminescence of a new class of UV–blue-emitting phosphors MSi2O2–δN2+2/3δ:Ce3+(M = Ca, Sr, Ba)
Source: Royal Society of Chemistry journal article supplement (doi:10.1039/b507735d), 2005-01-01
Supplement: b507735d.pdf [file b507735d.pdf]

**Luminescence of a new class UV- blue- emitting phosphors**  
**MSi<sub>2</sub>O<sub>2- $\delta$</sub> N<sub>2+2/3 $\delta$</sub> :Ce<sup>3+</sup> (M = Ca, Sr, Ba)**

Y.Q. Li, G. de With and H.T. Hintzen

*Laboratory of Materials and Interface Chemistry, Eindhoven University of  
Technology, P.O. Box 513, 5600 MB, Eindhoven, The Netherlands*

Table 1. X-ray powder diffraction data for MSi<sub>2</sub>O<sub>2- $\delta$</sub> N<sub>2+2/3 $\delta$</sub>  (M = Ca, Sr)

(a) M = Ca ( $\delta \approx 0$ )

| h | k | l  | d <sub>obs</sub> (Å) | 2 $\theta$ <sub>obs</sub> (deg.) | 2 $\theta$ <sub>cal</sub> (deg.) | $\Delta 2\theta$ (deg.) | I/I <sub>o</sub> (%) |
|---|---|----|----------------------|----------------------------------|----------------------------------|-------------------------|----------------------|
| 0 | 0 | 1  | 6.87726              | 12.862                           | 12.934                           | -0.072                  | 33.8                 |
| 1 | 1 | -1 | 5.94881              | 14.880                           | 14.881                           | -0.001                  | 3.2                  |
| 2 | 1 | -1 | 4.99010              | 17.760                           | 17.710                           | 0.050                   | 4.5                  |
| 1 | 2 | 1  | 4.75165              | 18.659                           | 18.671                           | -0.012                  | 7.8                  |
| 0 | 3 | 1  | 4.11482              | 21.579                           | 21.564                           | 0.015                   | 16.6                 |
| 1 | 4 | 0  | 3.75130              | 23.699                           | 23.741                           | -0.042                  | 8.6                  |
| 0 | 0 | 2  | 3.42184              | 26.019                           | 26.045                           | -0.026                  | 89.0                 |
| 0 | 1 | 2  | 3.33621              | 26.699                           | 26.685                           | 0.014                   | 64.9                 |
| 1 | 0 | 2  | 3.26388              | 27.302                           | 27.263                           | 0.039                   | 8.3                  |
| 1 | 1 | 2  | 3.19291              | 27.921                           | 27.876                           | 0.045                   | 17.6                 |
| 1 | 2 | -2 | 3.11022              | 28.679                           | 28.656                           | 0.023                   | 15.8                 |
| 1 | 2 | 2  | 3.00756              | 29.680                           | 29.648                           | 0.032                   | 21.7                 |
| 4 | 2 | 1  | 2.92864              | 30.499                           | 30.542                           | -0.043                  | 21.3                 |
| 3 | 1 | -2 | 2.89511              | 30.861                           | 30.878                           | -0.017                  | 10.6                 |
| 0 | 3 | 2  | 2.84840              | 31.380                           | 31.370                           | 0.010                   | 15.9                 |
| 1 | 3 | 2  | 2.75605              | 32.460                           | 32.404                           | 0.056                   | 9.8                  |
| 2 | 5 | -1 | 2.66657              | 33.581                           | 33.529                           | 0.052                   | 91.3                 |
| 1 | 4 | -2 | 2.54901              | 35.179                           | 35.114                           | 0.065                   | 62.1                 |
| 0 | 6 | 1  | 2.41504              | 37.200                           | 37.238                           | -0.038                  | 15.3                 |
| 5 | 0 | -2 | 2.36117              | 38.081                           | 38.138                           | -0.057                  | 100.0                |
| 0 | 5 | 2  | 2.29749              | 39.179                           | 39.242                           | -0.063                  | 24.1                 |
| 0 | 1 | 3  | 2.25539              | 39.941                           | 39.958                           | -0.017                  | 20.9                 |
| 1 | 0 | 3  | 2.22339              | 40.541                           | 40.551                           | -0.010                  | 10.9                 |
| 2 | 5 | 2  | 2.15431              | 41.901                           | 41.860                           | 0.041                   | 5.9                  |
| 2 | 7 | 0  | 2.12057              | 42.600                           | 42.627                           | -0.027                  | 5.4                  |
| 0 | 7 | 1  | 2.10172              | 43.001                           | 42.974                           | 0.027                   | 6.3                  |
| 0 | 3 | 3  | 2.08236              | 43.421                           | 43.378                           | 0.043                   | 5.0                  |
| 1 | 4 | -3 | 1.96743              | 46.099                           | 46.122                           | -0.023                  | 5.4                  |
| 5 | 6 | 0  | 1.94905              | 46.559                           | 46.487                           | 0.072                   | 8.8                  |
| 5 | 6 | -1 | 1.90811              | 47.619                           | 47.650                           | -0.031                  | 18.4                 |
| 5 | 1 | -3 | 1.88136              | 48.339                           | 48.309                           | 0.030                   | 15.6                 |
| 0 | 5 | 3  | 1.83713              | 49.580                           | 49.647                           | -0.067                  | 10.5                 |
| 2 | 7 | -2 | 1.82064              | 50.060                           | 50.013                           | 0.047                   | 6.2                  |
| 3 | 8 | 0  | 1.80177              | 50.621                           | 50.596                           | 0.025                   | 15.5                 |
| 7 | 3 | -2 | 1.77306              | 51.500                           | 51.491                           | 0.009                   | 2.5                  |

Table 1. (a)  $M = \text{Ca}$  ( $\delta \approx 0$ ) (cont.)

| h | k  | l  | $d_{\text{obs}}$ (Å) | $2\theta_{\text{obs}}$ (deg.) | $2\theta_{\text{cal}}$ (deg.) | $\Delta 2\theta$ (deg.) | $I/I_0$ (%) |
|---|----|----|----------------------|-------------------------------|-------------------------------|-------------------------|-------------|
| 5 | 0  | 3  | 1.73674              | 52.659                        | 52.638                        | 0.021                   | 6.9         |
| 0 | 0  | 4  | 1.70788              | 53.619                        | 53.581                        | 0.038                   | 13.7        |
| 5 | 2  | 3  | 1.69325              | 54.120                        | 54.055                        | 0.065                   | 2.6         |
| 2 | 9  | 0  | 1.67776              | 54.661                        | 54.568                        | 0.093                   | 10.6        |
| 0 | 9  | 1  | 1.66546              | 55.099                        | 55.042                        | 0.057                   | 0.9         |
| 3 | 6  | -3 | 1.64999              | 55.660                        | 55.665                        | -0.005                  | 3.6         |
| 1 | 2  | 4  | 1.64078              | 56.000                        | 55.938                        | 0.062                   | 17.2        |
| 4 | 7  | 2  | 1.63115              | 56.360                        | 56.394                        | -0.034                  | 6.2         |
| 2 | 9  | 1  | 1.61955              | 56.800                        | 56.806                        | -0.006                  | 2.4         |
| 4 | 1  | -4 | 1.60101              | 57.519                        | 57.499                        | 0.020                   | 3.7         |
| 4 | 6  | -3 | 1.59492              | 57.759                        | 57.784                        | -0.025                  | 4.1         |
| 2 | 3  | 4  | 1.55854              | 59.240                        | 59.276                        | -0.036                  | 29.0        |
| 4 | 6  | 3  | 1.51279              | 61.220                        | 61.150                        | 0.070                   | 11.2        |
| 1 | 10 | -1 | 1.50480              | 61.580                        | 61.606                        | -0.026                  | 8.4         |
| 0 | 5  | 4  | 1.49603              | 61.981                        | 61.985                        | -0.004                  | 2.8         |
| 5 | 3  | -4 | 1.47934              | 62.759                        | 62.730                        | 0.029                   | 5.6         |
| 2 | 10 | 1  | 1.47177              | 63.119                        | 63.048                        | 0.071                   | 3.6         |
| 2 | 5  | 4  | 1.44473              | 64.441                        | 64.434                        | 0.007                   | 9.4         |
| 7 | 3  | 3  | 1.43247              | 65.060                        | 65.047                        | 0.013                   | 2.2         |
| 2 | 10 | -2 | 1.39418              | 67.079                        | 67.065                        | 0.014                   | 3.2         |
| 2 | 6  | 4  | 1.38147              | 67.779                        | 67.852                        | -0.073                  | 5.6         |
| 0 | 11 | 1  | 1.37647              | 68.059                        | 68.001                        | 0.058                   | 1.6         |
| 0 | 0  | 5  | 1.36586              | 68.661                        | 68.587                        | 0.074                   | 10.4        |
| 1 | 7  | -4 | 1.35414              | 69.340                        | 69.281                        | 0.059                   | 3.6         |
| 0 | 2  | 5  | 1.34564              | 69.841                        | 69.803                        | 0.038                   | 5.2         |
| 5 | 4  | 4  | 1.33999              | 70.179                        | 70.174                        | 0.005                   | 1.8         |
| 2 | 1  | 5  | 1.32004              | 71.400                        | 71.472                        | -0.072                  | 3.0         |
| 1 | 3  | 5  | 1.30579              | 72.301                        | 72.267                        | 0.034                   | 2.6         |
| 0 | 11 | 2  | 1.30117              | 72.599                        | 72.639                        | -0.040                  | 2.1         |
| 8 | 7  | 2  | 1.28592              | 73.600                        | 73.667                        | -0.067                  | 14.5        |
| 2 | 3  | 5  | 1.28205              | 73.859                        | 73.854                        | 0.005                   | 5.4         |
| 2 | 10 | -3 | 1.27202              | 74.540                        | 74.520                        | 0.020                   | 6.2         |
| 1 | 8  | 4  | 1.26853              | 74.780                        | 74.780                        | 0.000                   | 4.4         |
| 1 | 12 | 1  | 1.26106              | 75.300                        | 75.339                        | -0.039                  | 2.7         |
| 0 | 7  | -1 | 1.23414              | 77.241                        | 77.251                        | -0.010                  | 2.4         |
| 3 | 8  | 4  | 1.22061              | 78.259                        | 78.282                        | -0.023                  | 1.7         |
| 0 | 11 | 3  | 1.19663              | 80.140                        | 80.131                        | 0.009                   | 2.3         |
| 4 | 10 | 3  | 1.19218              | 80.500                        | 80.496                        | 0.004                   | 2.9         |
| 1 | 13 | 0  | 1.18657              | 80.960                        | 80.989                        | -0.029                  | 2.1         |
| 0 | 0  | -4 | 1.17862              | 81.621                        | 81.609                        | 0.012                   | 3.4         |
| 2 | 13 | -1 | 1.16090              | 83.140                        | 83.139                        | 0.001                   | 5.4         |
| 5 | 10 | 3  | 1.15454              | 83.701                        | 83.633                        | 0.068                   | 1.8         |
| 1 | 10 | -4 | 1.14831              | 84.259                        | 84.212                        | 0.047                   | 1.8         |
| 1 | 10 | 4  | 1.13780              | 85.220                        | 85.183                        | 0.037                   | 1.7         |
| 1 | 8  | -5 | 1.11924              | 86.981                        | 86.968                        | 0.013                   | 2.3         |
| 2 | 0  | 6  | 1.11130              | 87.760                        | 87.760                        | 0.000                   | 3.4         |
| 1 | 3  | 6  | 1.10174              | 88.720                        | 88.678                        | 0.042                   | 3.8         |

(b) M = Sr ( $\delta \approx 1$ )

| h | k  | l  | D <sub>obs</sub> (Å) | 2 $\theta$ <sub>obs</sub> (deg.) | 2 $\theta$ <sub>cal</sub> (deg.) | $\Delta 2\theta$ (deg.) | I/I <sub>o</sub> (%) |
|---|----|----|----------------------|----------------------------------|----------------------------------|-------------------------|----------------------|
| 0 | 2  | 0  | 7.07617              | 12.499                           | 12.488                           | 0.011                   | 18.8                 |
| 2 | 0  | 0  | 5.66933              | 15.618                           | 15.596                           | 0.022                   | 1.2                  |
| 2 | 1  | -1 | 4.42284              | 20.060                           | 20.093                           | -0.033                  | 2.2                  |
| 0 | 0  | 2  | 3.88052              | 22.899                           | 22.927                           | -0.028                  | 2.0                  |
| 0 | 4  | 0  | 3.52827              | 25.221                           | 25.205                           | 0.016                   | 100.0                |
| 3 | 0  | -1 | 3.44003              | 25.879                           | 25.890                           | -0.011                  | 9.4                  |
| 3 | 1  | -1 | 3.34100              | 26.660                           | 26.662                           | -0.002                  | 5.8                  |
| 1 | 2  | 2  | 3.22702              | 27.620                           | 27.607                           | 0.013                   | 8.0                  |
| 2 | 1  | -2 | 3.16228              | 28.197                           | 28.189                           | 0.008                   | 2.1                  |
| 1 | 4  | -1 | 3.10376              | 28.740                           | 28.771                           | -0.031                  | 4.8                  |
| 4 | 0  | 0  | 2.83073              | 31.581                           | 31.570                           | 0.011                   | 45.5                 |
| 3 | 3  | 1  | 2.73149              | 32.760                           | 32.781                           | -0.021                  | 2.1                  |
| 2 | 3  | 2  | 2.61518              | 34.261                           | 34.234                           | 0.027                   | 7.4                  |
| 1 | 0  | -3 | 2.52959              | 35.458                           | 35.398                           | 0.060                   | 12.5                 |
| 3 | 4  | 1  | 2.43023              | 36.959                           | 36.972                           | -0.013                  | 4.7                  |
| 2 | 5  | 1  | 2.39278              | 37.559                           | 37.590                           | -0.031                  | 12.6                 |
| 0 | 6  | 0  | 2.34935              | 38.280                           | 38.248                           | 0.032                   | 2.4                  |
| 3 | 3  | 2  | 2.31446              | 38.880                           | 38.862                           | 0.018                   | 6.9                  |
| 1 | 3  | 3  | 2.20578              | 40.879                           | 40.867                           | 0.012                   | 6.3                  |
| 3 | 5  | 1  | 2.15633              | 41.860                           | 41.828                           | 0.032                   | 2.4                  |
| 5 | 2  | 1  | 2.06163              | 43.880                           | 43.906                           | -0.026                  | 3.7                  |
| 1 | 6  | 2  | 1.97151              | 45.998                           | 45.976                           | 0.022                   | 4.1                  |
| 0 | 0  | 4  | 1.93412              | 46.940                           | 46.927                           | 0.013                   | 5.2                  |
| 1 | 0  | 4  | 1.89683              | 47.920                           | 47.917                           | 0.003                   | 1.7                  |
| 2 | 7  | 1  | 1.83852              | 49.540                           | 49.537                           | 0.003                   | 6.6                  |
| 2 | 0  | 4  | 1.81460              | 50.238                           | 50.288                           | -0.050                  | 6.0                  |
| 1 | 7  | -2 | 1.76989              | 51.599                           | 51.635                           | -0.036                  | 6.3                  |
| 1 | 3  | 4  | 1.75718              | 52.000                           | 51.946                           | 0.054                   | 3.7                  |
| 6 | 3  | 0  | 1.74967              | 52.240                           | 52.220                           | 0.020                   | 6.0                  |
| 0 | 8  | 1  | 1.71678              | 53.319                           | 53.265                           | 0.054                   | 3.8                  |
| 2 | 4  | 4  | 1.61326              | 57.042                           | 57.094                           | -0.052                  | 1.3                  |
| 0 | 8  | 2  | 1.60501              | 57.362                           | 57.415                           | -0.053                  | 2.4                  |
| 1 | 5  | -4 | 1.58386              | 58.201                           | 58.156                           | 0.045                   | 11.4                 |
| 0 | 0  | 5  | 1.54854              | 59.661                           | 59.721                           | -0.060                  | 5.6                  |
| 2 | 9  | 1  | 1.47845              | 62.801                           | 62.768                           | 0.033                   | 3.7                  |
| 3 | 1  | 5  | 1.40790              | 66.340                           | 66.311                           | 0.029                   | 4.3                  |
| 1 | 5  | -5 | 1.34971              | 69.600                           | 69.532                           | 0.068                   | 1.2                  |
| 1 | 10 | 2  | 1.31242              | 71.879                           | 71.807                           | 0.072                   | 4.3                  |
